# Supplementary material for: Diurnal variation of steroid hormones and their reference intervals using mass spectrometric analysis
Source: PubMed Central journal article supplement — Endocr Connect. 2018 Oct 24;7(12):1354–61. doi: 10.1530/EC-18-0417 (PMC6280590; doi:10.1530/ec-18-0417), 2018-10-24
Supplement: EC-18-0417-t001.pdf [file EC-18-0417-t001.pdf]

Supplemental Table 1. Female Demographics

|                 |    |                            |
|-----------------|----|----------------------------|
| Post-menopausal | 54 | Caucasian                  |
| Post-menopausal | 52 | Asian                      |
| Post-menopausal | 67 | African / African American |
| Post-menopausal | 55 | Caucasian                  |
| Post-menopausal | 59 | Asian                      |
| Post-menopausal | 52 | African / African American |
| Post-menopausal | 63 | African / African American |
| Post-menopausal | 62 | African / African American |
| Post-menopausal | 61 | African / African American |
| Post-menopausal | 59 | African / African American |
| Post-menopausal | 52 | African / African American |
| Post-menopausal | 57 | African / African American |
| Post-menopausal | 59 | African / African American |
| Post-menopausal | 61 | African / African American |
| Post-menopausal | 56 | Caucasian                  |
| Post-menopausal | 49 | Other                      |
| Post-menopausal | 56 | African / African American |
| Post-menopausal | 57 | Caucasian                  |
| Post-menopausal | 63 | Caucasian                  |
| Post-menopausal | 53 | African / African American |
| Post-menopausal | 61 | Caucasian                  |
| Post-menopausal | 61 | Asian                      |
| Pre-menopausal  | 34 | Caucasian                  |
| Pre-menopausal  | 48 | Other                      |
| Pre-menopausal  | 35 | African / African American |
| Pre-menopausal  | 45 | African / African American |
| Pre-menopausal  | 41 | Asian                      |
| Pre-menopausal  | 49 | African / African American |

|                |    |                            |
|----------------|----|----------------------------|
| Pre-menopausal | 31 | Asian                      |
| Pre-menopausal | 27 | Caucasian                  |
| Pre-menopausal | 52 | Asian                      |
| Pre-menopausal | 36 | Caucasian                  |
| Pre-menopausal | 40 | Caucasian                  |
| Pre-menopausal | 36 | Asian                      |
| Pre-menopausal | 24 | African / African American |
| Pre-menopausal | 27 | African / African American |
| Pre-menopausal | 21 | African / African American |
| Pre-menopausal | 25 | African / African American |
| Pre-menopausal | 48 | African / African American |
| Pre-menopausal | 47 | African / African American |
| Pre-menopausal | 34 | African / African American |
| Pre-menopausal | 44 | African / African American |
| Pre-menopausal | 34 | African / African American |
| Pre-menopausal | 33 | African / African American |
| Pre-menopausal | 34 | African / African American |
| Pre-menopausal | 38 | African / African American |
| Pre-menopausal | 44 | African / African American |
| Pre-menopausal | 43 | African / African American |
| Pre-menopausal | 39 | African / African American |
| Pre-menopausal | 32 | African / African American |
| Pre-menopausal | 33 | African / African American |
| Pre-menopausal | 19 | Asian                      |
| Pre-menopausal | 20 | Caucasian                  |
| Pre-menopausal | 34 | Caucasian                  |
| Pre-menopausal | 31 | Asian                      |
| Pre-menopausal | 25 | Caucasian                  |
| Pre-menopausal | 31 | African / African American |
| Pre-menopausal | 24 | Caucasian                  |

|                |    |                            |
|----------------|----|----------------------------|
| Pre-menopausal | 30 | Caucasian                  |
| Pre-menopausal | 30 | Asian                      |
| Pre-menopausal | 28 | Caucasian                  |
| Pre-menopausal | 26 | Caucasian                  |
| Pre-menopausal | 33 | Caucasian                  |
| Pre-menopausal | 31 | Caucasian                  |
| Pre-menopausal | 30 | Caucasian                  |
| Pre-menopausal | 26 | Caucasian                  |
| Pre-menopausal | 33 | Caucasian                  |
| Pre-menopausal | 34 | Caucasian                  |
| Pre-menopausal | 29 | Other                      |
| Pre-menopausal | 27 | Other                      |
| Pre-menopausal | 35 | Other                      |
| Pre-menopausal | 40 | <b>Other</b>               |
| Pre-menopausal | 48 | Other                      |
| Pre-menopausal | 35 | Other                      |
| Pre-menopausal | 34 | Other                      |
| Pre-menopausal | 45 | Other                      |
| Pre-menopausal | 26 | Other                      |
| Pre-menopausal | 28 | Other                      |
| Pre-menopausal | 35 | Other                      |
| Pre-menopausal | 39 | Caucasian                  |
| Pre-menopausal | 20 | African / African American |
| Pre-menopausal | 35 | Caucasian                  |
| Pre-menopausal | 23 | African / African American |
| Pre-menopausal | 32 | Caucasian                  |
| Pre-menopausal | 37 | African / African American |
| Pre-menopausal | 22 | Caucasian                  |
| Pre-menopausal | 25 | African / African American |
| Pre-menopausal | 25 | African / African American |

|                |    |                            |
|----------------|----|----------------------------|
| Pre-menopausal | 33 | African / African American |
| Pre-menopausal | 47 | Caucasian                  |
| Pre-menopausal | 23 | African / African American |
| Pre-menopausal | 26 | African / African American |
| Pre-menopausal | 19 | Caucasian                  |
| Pre-menopausal | 30 | Asian                      |
| Pre-menopausal | 23 | Hispanic                   |
| Pre-menopausal | 34 | Asian                      |
| Pre-menopausal | 32 | African / African American |
| Pre-menopausal | 28 | Caucasian                  |
| Pre-menopausal | 26 | Asian                      |
| Pre-menopausal | 26 | Asian                      |
| Pre-menopausal | 39 | Caucasian                  |
| Pre-menopausal | 36 | African / African American |
| Pre-menopausal | 38 | Caucasian                  |
| Pre-menopausal | 44 | African / African American |
| Pre-menopausal | 33 | Caucasian                  |
| Pre-menopausal | 35 | Caucasian                  |
| Pre-menopausal | 41 | African / African American |
| Pre-menopausal | 45 | African / African American |
| Pre-menopausal | 42 | Caucasian                  |
| Pre-menopausal | 34 | Caucasian                  |
| Pre-menopausal | 46 | Asian                      |
| Pre-menopausal | 34 | Asian                      |
| Pre-menopausal | 32 | African / African American |
| Pre-menopausal | 40 | African / African American |
| Unk            | -  | Caucasian                  |
| Unk            | -  | African / African American |
| Unk            | -  | African / African American |
| Unk            | -  | Caucasian                  |

|     |   |           |
|-----|---|-----------|
| Unk | - | Caucasian |
| Unk | - | Caucasian |

**S Table 1.** Menopausal status, age, and race of female patients recruited (n=120).
