# Supplementary figures and images for: Diurnal variation of steroid hormones and their reference intervals using mass spectrometric analysis
Source: PubMed Central journal article supplement — Endocr Connect. 2018 Oct 24;7(12):1354–61. doi: 10.1530/EC-18-0417 (PMC6280590; doi:10.1530/ec-18-0417), 2018-10-24

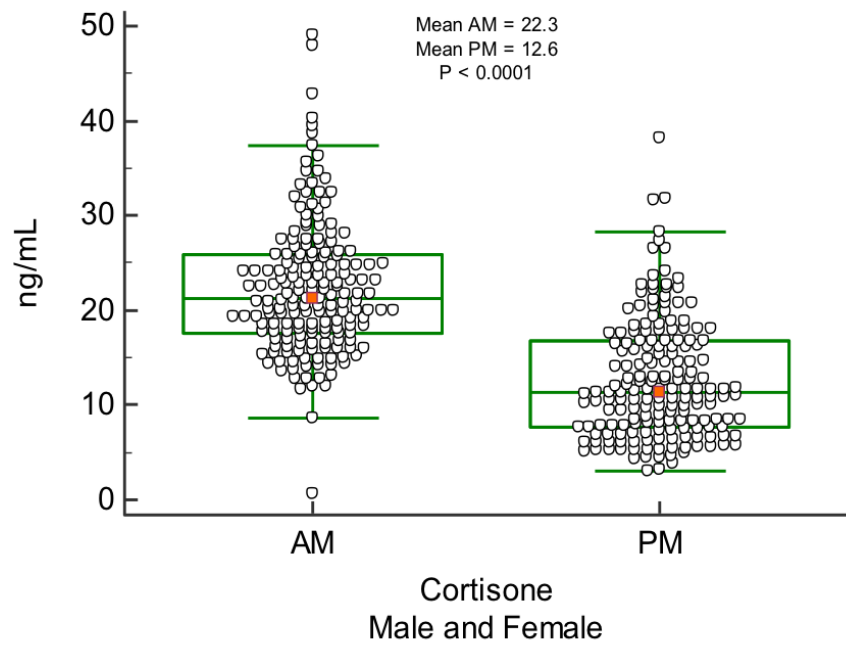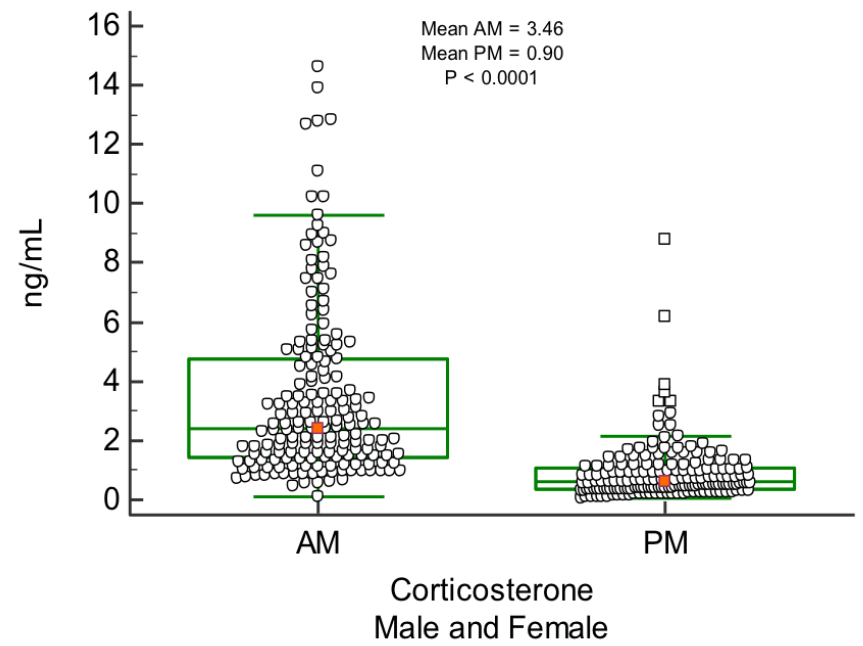

Supplement: EC-18-0417-s001.pdf [file EC-18-0417-s001.pdf]
